# Supplementary material for: Dietary inflammatory index and risk of upper aerodigestive tract cancer in Japanese adults
Source: PubMed Central journal article supplement (PMC5963633; doi:10.18632/oncotarget.25288), 2018-05-08
Supplement: oncotarget-09-24028-s001.pdf [file oncotarget-09-24028-s001.pdf]

## Dietary inflammatory index and risk of upper aerodigestive tract cancer in Japanese adults

### SUPPLEMENTARY MATERIALS

**Supplementary Table 1: The remaining 23 food parameters that were not used or were missing**

| <b>Food Parameter</b> | <b>Not available/used in the Japanese Head and Neck cancer study</b> |
|-----------------------|----------------------------------------------------------------------|
| 1. Magnesium          | Not available                                                        |
| 2. Niacin             | Not available                                                        |
| 3. Alcohol            | Not used                                                             |
| 4. Selenium           | Not available                                                        |
| 5. Trans Fat          | Not available                                                        |
| 6. Zinc               | Not available                                                        |
| 7. Tea                | Not available                                                        |
| 8. Isoflavones        | Not available                                                        |
| 9. Pepper             | Not available                                                        |
| 10. ThymeOregano      | Not available                                                        |
| 11. Caffeine          | Not available                                                        |
| 12. Rosemary          | Not available                                                        |
| 13. Flavan3ol         | Not available                                                        |
| 14. Flavones          | Not available                                                        |
| 15. Flavonols         | Not available                                                        |
| 16. Flavonones        | Not available                                                        |
| 17. Anthocyanidins    | Not available                                                        |
| 18. Turmeric          | Not available                                                        |
| 19. Saffron           | Not available                                                        |
| 20. Onion             | Not available                                                        |
| 21. Garlic            | Not available                                                        |
| 22. Ginger            | Not available                                                        |
| 23. Eugenol           | Not available                                                        |

**Supplementary Table 2: DII and estimated items among controls**

| Estimated items                        | DII quartiles (median, interquartile range) |                 |                |                | P value |
|----------------------------------------|---------------------------------------------|-----------------|----------------|----------------|---------|
|                                        | 1                                           | 2               | 3              | 4              |         |
| Protein (g/d)                          | 58.8, 13.8                                  | 53.9, 13.0      | 50.3, 11.6     | 46.0, 11.9     | <0.001  |
| Fat (g/d)                              | 48.7, 14.                                   | 41.9, 11.7      | 39.0, 10.9     | 34.1, 10.6     | <0.001  |
| Carbohydrate (g/d)                     | 238.4, 56.8                                 | 236.0, 61.4     | 231.3, 62.4    | 238.5, 76.2    | 0.011   |
| Total dietary fiber (g/d)              | 13.5, 3.3                                   | 10.8, 2.6       | 9.2, 2.0       | 7.8, 2.2       | <0.001  |
| Cholesterol (mg/d)                     | 267.8, 103.4                                | 234.6, 99.4     | 227.2, 95.4    | 185.9, 77.5    | <0.001  |
| Saturated fatty acid (g/d)             | 12.0, 3.5                                   | 10.9, 3.3       | 10.3, 3.1      | 9.3, 3.1       | <0.001  |
| Monounsaturated fatty acid (g/d)       | 17.8, 5.4                                   | 15.1, 4.1       | 14.0, 12.5     | 12.5, 2.7      | <0.001  |
| Polyunsaturated fatty acid (g/d)       | 15.1, 12.5                                  | 12.5, 3.5       | 11.5, 2.6      | 10.1, 2.5      | <0.001  |
| n-3 polyunsaturated fatty acid (mg/dl) | 2694.3, 808.6                               | 2279.1, 565.3   | 2083.5, 508.9  | 1732.6, 403.6  | <0.001  |
| n-6 polyunsaturated fatty acid (mg/d)  | 12305.8, 4095.8                             | 10248.1, 3192.1 | 9489.0, 2650.1 | 8324.2, 2454.8 | <0.001  |
| Carotene (µg/d)                        | 4302.7, 1456.7                              | 2916.9, 961.4   | 2313.9, 776.9  | 1915.0, 374.8  | <0.001  |
| Vitamin B1 (mg/d)                      | 0.7, 0.1                                    | 0.6, 0.1        | 0.6, 0.1       | 0.6, 0.1       | <0.001  |
| Vitamin B2(mg/d)                       | 1.3, 0.3                                    | 1.1, 0.3        | 1.0, 0.3       | 0.9, 0.3       | <0.001  |
| Vitamin C (mg/d)                       | 126.1, 43.5                                 | 97.5, 35.6      | 79.7, 31.8     | 60.8, 25.8     | <0.001  |
| Vitamin D (µg/d)                       | 9.8, 4.7                                    | 8.2, 3.4        | 7.5, 3.2       | 4.8, 1.2       | <0.001  |
| Vitamin E (mg/d)                       | 10.0, 2.5                                   | 8.0, 1.5        | 7.0, 1.4       | 6.0, 1.3       | <0.001  |
| Reti EQ (mg/d)                         | 1270.9, 547.2                               | 891.8, 468.4    | 690.9, 439.9   | 526.8, 174.4   | <0.001  |
| Folate (µg/d)                          | 431.7, 104.3                                | 335.3, 79.9     | 278.1, 69.6    | 222.8, 66.3    | <0.001  |
| Fe (µg/d)                              | 8.8, 2.3                                    | 7.3, 1.8        | 6.4, 1.7       | 5.3, 1.5       | <0.001  |
| Meat (g/d)                             | 35.5, 28.0                                  | 27.5, 23.5      | 26.5, 18.5     | 21.0, 13.5     | <0.001  |
| Fish (g/d)                             | 50.0, 29.5                                  | 40.0, 23.5      | 36.5, 23.0     | 18.0, 6.5      | <0.001  |
| Seafoods other than fish (g/d)         | 19.5, 17.0                                  | 16.0, 11.0      | 14.0, 8.5      | 12.5, 7.5      | <0.001  |
| Green-yellow vegetables (g/d)          | 110.0, 55.0                                 | 64.0, 33.0      | 40.0, 23.0     | 27.0, 16.0     | <0.001  |
| Other vegetables (g/d)                 | 89.5, 47.5                                  | 60.0, 34.5      | 43.5, 29.0     | 27.0, 20.5     | <0.001  |
| Fruits (g/d)                           | 88.0, 78.0                                  | 58.0, 62.0      | 34.0, 47.0     | 25.0, 17.0     | <0.001  |
| Soy (g/d)                              | 55.0, 36.0                                  | 44.5, 33.0      | 37.0, 32.0     | 31.0, 27.0     | <0.001  |
